# Supplementary material
Source: Springer Nature journal article supplement (https://www.springermedizin.de/resource/supplementary/13012_2014_760_MOESM4_ESM.pdf/9630634)
Supplement: MOESM4 [file 9630634]

# PMTCT & Linkages Cascade

| #pregnant women 6 months) |
|---------------------------|
| 2,000                     |

Increase in completion of maternal & newborn cART/PPO if drop-off eliminated

| STEP 1: 1st ANC Visit |
|-----------------------|
| 1,900<br>97.3%        |

8

| STEP 2: Tested for HIV |
|------------------------|
| 1,600<br>88.6%         |

28

| HIV+         |
|--------------|
| 240<br>15.0% |

| STEP 3: Maternal cART/<br>effective PPO |
|-----------------------------------------|
| 200<br>83.3%                            |

30

| STEP 4: Newborn with PPO<br>in the maternity |
|----------------------------------------------|
| 180<br>75.0%                                 |

60

Increase in children on cART if drop-off eliminated

| STEP 5: Children enrolled<br>in HIV care |
|------------------------------------------|
| 180<br>75.0%                             |

0

| STEP 6: Children with PCR<br><8 weeks |
|---------------------------------------|
| 120<br>66.7%                          |

1

| Children dx HIV+ |
|------------------|
| 10<br>8.3%       |

| STEP 7: Children starting<br>cART |
|-----------------------------------|
| 2<br>20.0%                        |

8
